# Supplementary material
Source: publisher figshare collection journal article supplement (https://brill.figshare.com/ndownloader/files/22385916)
Supplement: Supplementary file 1 [file 22385916]

Reproductive biology of the Sword Snake *Tomodon dorsatus* (Serpentes: Dipsadidae) in South Brazil: comparisons within the tribe Tachymenini

Luiza Loebens<sup>1,\*</sup>, Selma Maria Almeida-Santos<sup>2</sup>, Sonia Zanini Cechin<sup>1</sup>

1 - Laboratory of Herpetology, Department of Ecology and Evolution, Santa Maria Federal University, Santa Maria, Brazil

2 - Laboratory of Ecology and Evolution, Butantan Institute, São Paulo, Brazil

\*Corresponding author; e-mail: loebens.luiza@gmail.com

**Supplementary material**

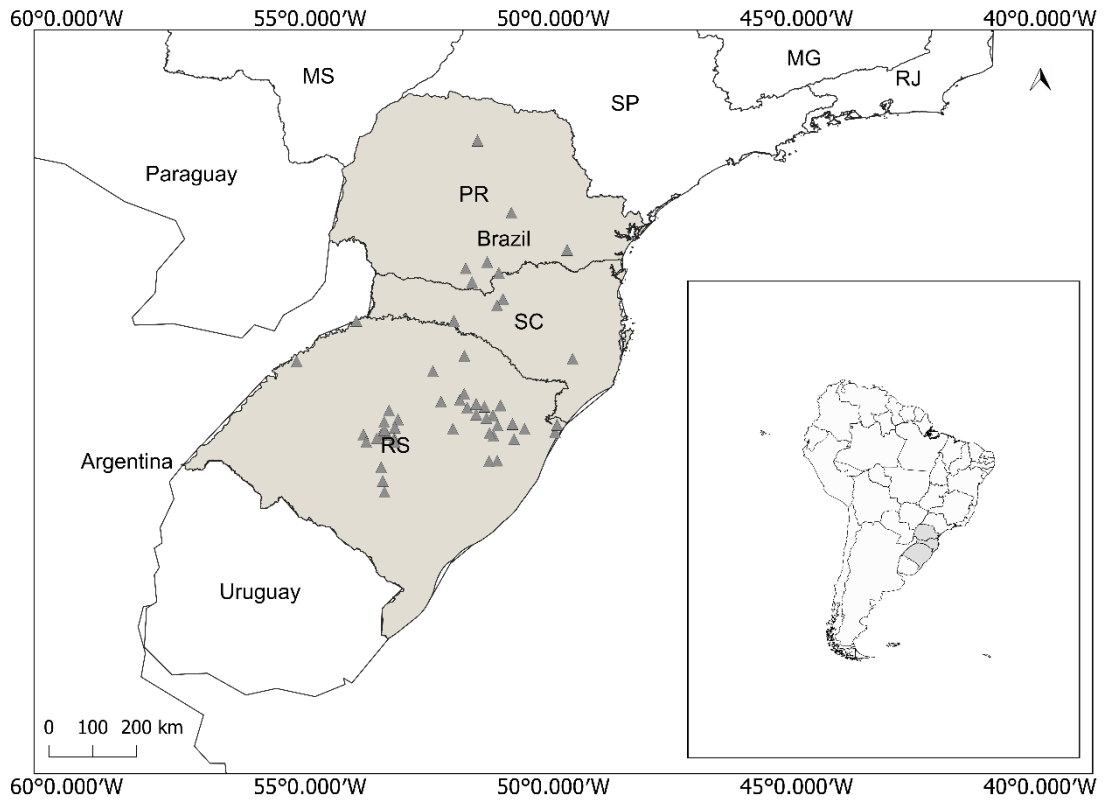

**Figure S1.** Map of the south region of Brazil (Rio Grande do Sul, Paraná, and Santa Catarina States; gray area) showing the sampling localities of the distribution of *Tomodon dorsatus* (triangles).

**Table S1.** Stages of the spermatogenic cycle of *Tomodon dorsatus* in South Brazil.

| Stages                                                                       | Months of occurrence |
|------------------------------------------------------------------------------|----------------------|
| I) Complete regression                                                       | May                  |
| II) Early recrudescence: division of spermatogonia and primary spermatocytes | June–July            |
| III) Late recrudescence: primary spermatocytes and spermatids                | July– September      |
| IV) Early spermiogenesis: spermatids in metamorphosis                        | October–January      |
| V) Spermiogenesis: mature spermatozoa in the lumen                           | November– March      |
| VI) Early regression: decrease of the seminiferous epithelium                | April– May           |

Adapted from Goldberg and Parker, 1975.

**Table S2.** Stages of the SSK cycle of *Tomodon dorsatus* in South Brazil.

| Stages                                              | Months of occurrence |
|-----------------------------------------------------|----------------------|
| 0) SSK not hypertrophied                            | February–April       |
| 1) SSK hypertrophied with a few granules            | May–June             |
| 2) SSK cytoplasm full of secretory granules         | July–September       |
| 3) SSK secretory granules apically in the cytoplasm | September–October    |
| 4) Maximum density of SSK secretory granules        | November–January     |

Adapted from Krohmer, Martinez and Mason, 2004.

**Table S3.** Stages of the annual reproductive cycle of males *Tomodon dorsatus* in South Brazil.

|                                 | Summer | Autumn | Winter | Spring |
|---------------------------------|--------|--------|--------|--------|
| Testes hypertrophy (volume)     | Shaded |        |        | Shaded |
| GSI increase                    | Shaded |        |        | Shaded |
| Spermatogenesis                 |        |        |        | Shaded |
| Spermiogenesis                  | Shaded |        |        | Shaded |
| Seminiferous tubule hypertrophy | Shaded |        |        | Shaded |
| Leydig cell activity            | Shaded |        |        | Shaded |
| SSK hypertrophy                 |        |        | Shaded | Shaded |
| SSK secretory peak              |        |        | Shaded | Shaded |
| Testicular regression           |        | Shaded |        |        |
| Secondary vitellogenesis peak   |        |        |        | Shaded |
| GSI increase                    |        |        |        | Shaded |
| Ovulation                       |        |        |        | Shaded |
| Mating                          |        |        |        | Shaded |
| UVJ sperm storage               |        | Shaded | Shaded | Shaded |
| Pregnancy                       | Shaded | Shaded | Shaded | Shaded |
| Neonates                        | Shaded | Shaded | Shaded | Shaded |

GSI, gonadosomatic index; SSK, sexual segment of the kidney; UVJ, utero-vaginal junction.

Shades area correspond to the season of activity.
